# Supplementary material
Source: PubMed Central journal article supplement (PMC3260780)

# **Model Systems of Precursor Cellular Membranes: Long-Chain Alcohols Stabilize Spontaneously Formed Oleic Acid Vesicles**

Adela Rendón,<sup>†</sup> David Gil Carton,<sup>‡</sup> Jesús Sot,<sup>†</sup> Marcos García-Pacios,<sup>†</sup> Ruth Montes,<sup>†</sup> Mikel Valle,<sup>‡</sup> José-Luis R. Arrondo,<sup>†</sup> Felix M. Goñi,<sup>†</sup> and Kepa Ruiz-Mirazo<sup>†^</sup>

<sup>†</sup>Unidad de Biofísica (CSIC-UPV/EHU), Departamento de Bioquímica, Universidad del País Vasco, Bilbao, Spain; <sup>‡</sup>Unidad de Biología Estructural, CIC-Biogune, Derio, Bizkaia, Spain; and <sup>^</sup>Departamento de Lógica y Filosofía de la Ciencia, Universidad del País Vasco, Donostia – San Sebastián, Spain.

## **Supporting Material**

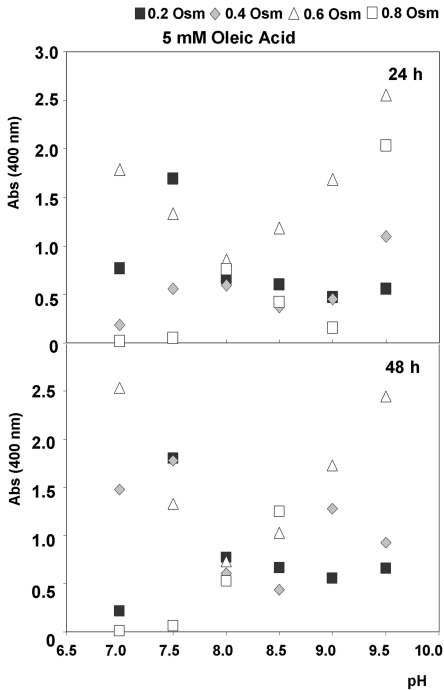

Supplement: mmc1.pdf [file mmc1.pdf]
